# Supplementary material for: Non-Transfusion-Dependent Thalassemia: A Panoramic Review
Source: MDPI journal article supplement (doi:10.3390/medicina58101496), 2022-10-21
Supplement: s1 [file s1]

**Supplementary Table S1.** Case series showing the effect of coinheritance of alpha chain abnormalities and effect on disease severity in thalassemia (representative studies with more than 20 patients)

| Author                                                         | Number of patients | Type of beta genotype and/or degree of beta chain production                                                                            | Frequency and Type of alpha gene inheritance                           | Number (%) Effect on phenotype or transfusion frequency                                                                                                                     | Author's conclusion                                                                                                                          |
|----------------------------------------------------------------|--------------------|-----------------------------------------------------------------------------------------------------------------------------------------|------------------------------------------------------------------------|-----------------------------------------------------------------------------------------------------------------------------------------------------------------------------|----------------------------------------------------------------------------------------------------------------------------------------------|
| <i>Triplicated / quadruplicated <math>\alpha</math>-chains</i> |                    |                                                                                                                                         |                                                                        |                                                                                                                                                                             |                                                                                                                                              |
| Farashi et al.[1]                                              | 23                 | 13 Heterozygous                                                                                                                         | 13 $\alpha\alpha/\alpha\alpha\alpha$                                   | 4 (30.8%) No transfusions<br>1 (7.6%) Infrequent transfusion<br>4 (30.8%) Intermittent transfusion<br>4 (30.8%) Regular transfusion                                         | $\alpha$ -gene triplication could aggravate the mild phenotype of the $\beta$ -thalassemia carrier to the level of an intermediate phenotype |
|                                                                |                    | 7 Compound heterozygous                                                                                                                 | 6 $\alpha\alpha/\alpha\alpha\alpha$<br>1 $\alpha-/ \alpha\alpha\alpha$ | 2 (28.6%) Intermittent transfusion<br>5 (71.4%) Regular transfusion                                                                                                         |                                                                                                                                              |
|                                                                |                    | 3 Homozygous                                                                                                                            | 3 $\alpha\alpha/\alpha\alpha\alpha$                                    | 1 (33.3%) No transfusion<br>2 (66.6%) Regular transfusion                                                                                                                   |                                                                                                                                              |
| Mehta et al.[2]                                                | 39                 | 3 homozygous or compound heterozygous<br><br>1 severe $\beta^+/\beta^0$<br>1 $\beta^0$ / mild $\beta^{++}$<br>1 $\beta^{++}/\beta^{++}$ | 3 $\alpha\alpha/\alpha\alpha\alpha$                                    | 1 (33.3%) No transfusions<br>1 (33.3%) Intermittent transfusion<br>1 (33.3%) Regular transfusion                                                                            | $\alpha$ -gene triplication interaction with a diversity of $\beta$ -thalassemia mutations leads to variable phenotypes                      |
|                                                                |                    | 36 heterozygous<br><br>21 severe $\beta^+$<br>10 mild $\beta^+$<br>5 $\beta^0$                                                          | 3 $\alpha\alpha/\alpha\alpha\alpha$                                    | 16 (44.4%) No transfusions / asymptomatic<br>2 (5.5%) Intermittent transfusion during pregnancy<br>10 (27.8%) Infrequent transfusion<br>7 (19.4%) Intermittent transfusions |                                                                                                                                              |
| Traeger-Synodinos et al.[3]                                    | 20                 | 20 heterozygous<br><br>4 $\beta^+$<br>13 $\beta^0$                                                                                      | 3 $\alpha\alpha\alpha/\alpha\alpha\alpha$                              | 1 (33.3%) No transfusion<br>2 (66.7%) Required transfusions then discontinued                                                                                               | A combination of homozygous or heterozygous triplicated $\alpha$ -globin gene with a severe $\beta$ -thalassemia mutation can                |

|                       |                 |                                                                                                   |                                                                                  |                                                                                                                                                                                             |                                                                                                                                                                                                                                                            |
|-----------------------|-----------------|---------------------------------------------------------------------------------------------------|----------------------------------------------------------------------------------|---------------------------------------------------------------------------------------------------------------------------------------------------------------------------------------------|------------------------------------------------------------------------------------------------------------------------------------------------------------------------------------------------------------------------------------------------------------|
|                       |                 |                                                                                                   | 17 $\alpha\alpha/\alpha\alpha$                                                   | 1 (5.9%) No anemia<br>7 (41.2%) Mild anemia<br>1 (5.9%) Mild to moderate anemia<br>6 (35.3%) Moderate anemia<br>1 (5.9%) Severe anemia<br>1 (5.9%) Reported only jaundice, baseline Hb 11.4 | worsen hematologic indices and the degree of anemia                                                                                                                                                                                                        |
| Ropero et al.[4]      | 73              | 4 heterozygous<br><br>1 mild $\beta^+$<br>1 severe $\beta^+$<br>2 $\beta^0$                       | 3 $\alpha\alpha\alpha/\alpha\alpha$<br>1 $\alpha\alpha\alpha\alpha/\alpha\alpha$ | 2 (50%) Mild TI<br>2 (50%) Severe TI                                                                                                                                                        | The effect of the association of $\alpha$ -globin gene triplication with a heterozygous $\beta$ -thalassemia mutation is highly variable. The phenotype can range from thalassemic trait to a thalassemia intermedia that can become transfusion dependent |
|                       |                 | 64 heterozygous<br><br>4 mild $\beta^+$<br>15 severe $\beta^+$<br>45 $\beta^0$                    | 63 $\alpha\alpha\alpha/\alpha\alpha$<br>1 $\alpha\alpha\alpha/-\alpha^{3.7}$     | 39 (60.9%) Mild TI<br>16 (25%) Severe TI<br>9 (14.1%) Thalassemia trait                                                                                                                     |                                                                                                                                                                                                                                                            |
|                       |                 | 5 heterozygous<br><br>5 mild $\beta^+$ ( $\delta\beta$ thalassemia)                               | 5 $\alpha\alpha\alpha/\alpha\alpha$                                              | 5 (100%) Thalassemia trait                                                                                                                                                                  |                                                                                                                                                                                                                                                            |
|                       |                 | <b><i><math>\alpha</math>-chains deletions (co-inherited <math>\alpha</math> thalassemia)</i></b> |                                                                                  |                                                                                                                                                                                             |                                                                                                                                                                                                                                                            |
| Charoenkwan et al.[5] | 80              | $\beta^0$ -thalassemia / Hb E or $\beta^+$ -thalassemia / Hb E                                    | 62 $\alpha\alpha/\alpha\alpha$                                                   | 17 (27.4%) Mild phenotype<br>30 (48.4%) Moderate phenotype<br>15 (24.3%) Severe phenotype                                                                                                   | Coinheritance of $\alpha$ -thalassemia alleviates the degree of disease severity in pediatric patients with HbE/ $\beta$ -thalassemia                                                                                                                      |
|                       |                 |                                                                                                   | 13 $\alpha\alpha/\alpha^-$ or $\alpha\alpha/\alpha\alpha^{CS}$                   | 5 (38.5%) Mild phenotype<br>5 (38.5%) Moderate phenotype<br>3 (23%) Severe phenotype                                                                                                        |                                                                                                                                                                                                                                                            |
|                       |                 |                                                                                                   | 5 $\alpha\alpha/--$                                                              | 5 (100%) Mild phenotype                                                                                                                                                                     |                                                                                                                                                                                                                                                            |
| Neishabury et al.[6]  | 52 <sup>s</sup> | Homozygous or compound heterozygous<br><br>25 severe $\beta^+$ or $\beta^0$                       | 34 $\alpha\alpha/\alpha\alpha$<br>1 not available                                | 1 (2.9%) Not reported<br>3 (8.6%) No transfusion<br>6 (17.1%) Transfusion once<br>2 (5.7%) Irregular transfusion                                                                            | The diversity in the presentation of thalassemia intermedia indicates the limitations of the applied                                                                                                                                                       |

|                       |     |                                                                                    |                                                    |                                                                                                                        |                                                                                                                                                               |
|-----------------------|-----|------------------------------------------------------------------------------------|----------------------------------------------------|------------------------------------------------------------------------------------------------------------------------|---------------------------------------------------------------------------------------------------------------------------------------------------------------|
|                       |     | 4 $\beta^+/\beta^+$ Mild mutation<br>4 $\beta^0/\beta^+$<br>2 $\beta/\beta^0$      |                                                    | 1 (2.9%) Required transfusions then discontinued<br>22 (62.9%) Regular transfusion                                     | clinical, hematological, and molecular approaches for correct diagnosis                                                                                       |
|                       |     | 4 homozygous<br>4 compound heterozygous                                            | 8 $\alpha\alpha/\alpha^-$                          | 3 (37.5%) No transfusion<br>1 (12.5%) Transfusion once<br>2 (25%) Irregular transfusion<br>2 (25%) Regular transfusion |                                                                                                                                                               |
|                       |     | 2 homozygous $\delta\beta$ thalassemia<br>1 heterozygous $\delta\beta$ thalassemia | 1 $\alpha\alpha/\alpha\alpha$<br>2 not available   | 2 (66.6%) No transfusion<br>1 (33.3%) Regular transfusion                                                              |                                                                                                                                                               |
| Saha et al.[7]        | 270 | 19 $\beta^+/\beta^+$                                                               | 16 $\alpha\alpha/\alpha\alpha$                     | 4 (25%) Severe phenotype                                                                                               | $\alpha$ globin gene deletion can ameliorate the phenotype in patients with $\beta^+/\beta^0$ phenotype                                                       |
|                       |     |                                                                                    | 3 $\alpha\alpha/\alpha^-$                          | 0 (0%) Severe phenotype                                                                                                |                                                                                                                                                               |
|                       |     | 177 $\beta^+/\beta^0$                                                              | 143 $\alpha\alpha/\alpha\alpha$                    | 112 (78.3%) Severe phenotype                                                                                           |                                                                                                                                                               |
|                       |     |                                                                                    | 34 $\alpha\alpha/\alpha^-$                         | 13 (38.2%) Severe phenotype                                                                                            |                                                                                                                                                               |
|                       |     | 74 $\beta^0/\beta^0$                                                               | 43 $\alpha\alpha/\alpha\alpha$                     | 42 (97.7%) Severe phenotype                                                                                            |                                                                                                                                                               |
|                       |     |                                                                                    | 30 $\alpha\alpha/\alpha^-$                         | 29 (9.7%) Severe phenotype                                                                                             |                                                                                                                                                               |
| Winichagoon et al.[8] | 144 | 21 $\beta^+/\beta^0$                                                               | 12 $\alpha\alpha/\alpha\alpha$                     | 6 (50%) Mild phenotype<br>1 (8.3%) Moderate phenotype<br>5 (41.7%) Severe phenotype                                    | The concomitant inheritance of $\alpha^-$ -thalassemia could alleviate the severity of $\beta^-$ -thalassemia disease in those patients who have at least one |
|                       |     |                                                                                    | 3 $\alpha\alpha/\alpha^-$<br>1 $\alpha^-/\alpha^-$ | 4 (100%) Mild phenotype                                                                                                |                                                                                                                                                               |

|                                                                |                 |                                         |                                                                        |                                                                                           |                                                                                                                                                                          |
|----------------------------------------------------------------|-----------------|-----------------------------------------|------------------------------------------------------------------------|-------------------------------------------------------------------------------------------|--------------------------------------------------------------------------------------------------------------------------------------------------------------------------|
|                                                                |                 |                                         | 4 $\alpha\alpha/\alpha$ -<br>1 $\alpha\alpha/\alpha\alpha^{\text{CS}}$ | 3 (60%) Moderate phenotype<br>2 (40%) Severe phenotype                                    | allele of mild $\beta$ -thalassemia genotype                                                                                                                             |
|                                                                |                 | 33 $\beta^0/\beta^0$                    | 25 $\alpha\alpha/\alpha\alpha$                                         | 3 (12%) Moderate phenotype<br>22 (88%) Severe phenotype                                   |                                                                                                                                                                          |
|                                                                |                 |                                         | 4 $\alpha\alpha/--$<br>1 $\alpha-/ \alpha-$                            | 2 (40%) Moderate phenotype<br>3 (60%) Severe phenotype                                    |                                                                                                                                                                          |
|                                                                |                 |                                         | 3 $\alpha\alpha/\alpha-$                                               | 3 (100%) Severe phenotype                                                                 |                                                                                                                                                                          |
|                                                                |                 | 82 $\beta^0$ / HbE<br>4 $\beta^+$ / HbE | 74 $\alpha\alpha/\alpha\alpha$                                         | 27 (36.5%) Mild phenotype<br>41 (55.4%) Moderate phenotype<br>12 (16.2%) Severe phenotype |                                                                                                                                                                          |
|                                                                |                 |                                         | 8 $\alpha\alpha/\alpha$ -<br>4 $\alpha\alpha/\alpha\alpha^{\text{CS}}$ | 12 (100%) Mild phenotype                                                                  |                                                                                                                                                                          |
| Ho et al.[9]                                                   | 65              | 20 homozygous                           | 19 $\alpha\alpha/\alpha\alpha$                                         | 12 (63.2%) Mild phenotype<br>3 (15.8%) Moderate phenotype<br>4 (20%) Severe phenotype     | The modulating effect of $\alpha$ -thalassemia might not be evident in this cohort due to the low frequency of a thalassemia compounded by the diverse $\beta$ genotypes |
|                                                                |                 |                                         | 1 $\alpha\alpha/\alpha-$                                               | 1 (100%) severe phenotype                                                                 |                                                                                                                                                                          |
|                                                                |                 | 45 compound heterozygous                | 39 $\alpha\alpha/\alpha\alpha$                                         | 17 (43.6%) Mild phenotype<br>14 (35.9%) Moderate phenotype<br>8 (20.5%) Severe phenotype  |                                                                                                                                                                          |
|                                                                |                 |                                         | 6 $\alpha\alpha/\alpha-$                                               | 3 (50%) Mild phenotype<br>1 (16.7%) Moderate phenotype<br>2 (33.3%) Severe phenotype      |                                                                                                                                                                          |
| Studies reporting both types of $\alpha$ -globin abnormalities |                 |                                         |                                                                        |                                                                                           |                                                                                                                                                                          |
| Perera et al.[10]                                              | 50 <sup>#</sup> | 33 Heterozygous                         | 28 excess $\alpha$ -chains                                             | 17 (60.7%) Mild phenotype<br>8 (28.6%) Moderate phenotype<br>3 (10.7%) Severe phenotype   | Co-inheritance of either excess $\alpha$ -globin genes in heterozygotes $\beta$ -thalassemia or $\alpha$ -globin gene deletions in                                       |

|                      |     |                                            |                                                        |                                                                                                                                       |                                                                                                                                                                             |
|----------------------|-----|--------------------------------------------|--------------------------------------------------------|---------------------------------------------------------------------------------------------------------------------------------------|-----------------------------------------------------------------------------------------------------------------------------------------------------------------------------|
|                      |     | 17 homozygous                              | 9 $\alpha$ -globin deletion                            | 1 (11.1%) Mild phenotype<br>1 (11.1%) Moderate phenotype<br>7 (77.8%) Severe phenotype                                                | homozygotes $\beta$ -thalassemia is a significant factor in modulating disease severity                                                                                     |
| Sripichai et al.[11] | 925 | Heterozygous $\beta^0$ -thalassemia / Hb E | 840 $\alpha\alpha/\alpha\alpha$                        | 113 (13.5%) No transfusions<br>140 (16.7%) Rare transfusion<br>138 (16.4%) Occasional transfusion<br>449 (53.5%) Frequent transfusion | The genetic combination leading to the increase/decrease degree of $\alpha$ -to non- $\alpha$ -globin chains imbalance is a cause of the severe/mild thalassemia phenotype. |
|                      |     |                                            | 80 $\alpha\alpha/\alpha$ -<br>1 $\alpha$ -/ $\alpha$ - | 52 (64.2%) No transfusion<br>23 (28.4%) Rare transfusion<br>6 (7.4%) Occasional transfusion                                           |                                                                                                                                                                             |
|                      |     |                                            | 4 $\alpha\alpha\alpha/\alpha\alpha$                    | 4 (100%) Frequent transfusion                                                                                                         |                                                                                                                                                                             |

TI: thalassemia intermedia

^The definition of frequency of transfusion and severity of phenotype was not unified between studies

#5 patients excluded as 4 were described with membranopathies and 1 with unexplained moderate TI

\$ 6 patients as 3 had coinheritance of HbS and 3 patients without known beta thalassemia mutation

## References

1. Farashi, S.; Bayat, N.; Faramarzi Garous, N.; Ashki, M.; Montajabi Niat, M.; Vakili, S.; Imanian, H.; Zeinali, S.; Najmabadi, H.; Azarkeivan, A. Interaction of an alpha-Globin Gene Triplication with beta-Globin Gene Mutations in Iranian Patients with beta-Thalassemia Intermedia. *Hemoglobin* **2015**, *39*, 201-206, doi:10.3109/03630269.2015.1027914.
2. Mehta, P.R.; Upadhye, D.S.; Sawant, P.M.; Gorivale, M.S.; Nadkarni, A.H.; Shanmukhaiah, C.; Ghosh, K.; Colah, R.B. Diverse phenotypes and transfusion requirements due to interaction of beta-thalassemias with triplicated alpha-globin genes. *Ann Hematol* **2015**, *94*, 1953-1958, doi:10.1007/s00277-015-2479-8.
3. Traeger-Synodinos, J.; Kanavakis, E.; Vrettou, C.; Maragoudaki, E.; Michael, T.; Metaxotou-Mavromati, A.; Kattamis, C. The triplicated alpha-globin gene locus in beta-thalassaemia heterozygotes: clinical, haematological, biosynthetic and molecular studies. *Br J Haematol* **1996**, *95*, 467-471, doi:10.1046/j.1365-2141.1996.d01-1939.x.
4. Ropero, P.; Gonzalez Fernandez, F.A.; Nieto, J.M.; Torres-Jimenez, W.M.; Benavente, C. beta-Thalassemia Intermedia: Interaction of alpha-Globin Gene Triplication With beta-thalassemia Heterozygous in Spain. *Front Med (Lausanne)* **2022**, *9*, 866396, doi:10.3389/fmed.2022.866396.
5. Charoenkwan, P.; Teerachaimahit, P.; Sanguansermisri, T. The correlation of alpha-globin gene mutations and the XmnI polymorphism with clinical severity of Hb E/beta-thalassemia. *Hemoglobin* **2014**, *38*, 335-338, doi:10.3109/03630269.2014.952744.
6. Neishabury, M.; Azarkeivan, A.; Oberkanins, C.; Esteghamat, F.; Amirizadeh, N.; Najmabadi, H. Molecular mechanisms underlying thalassemia intermedia in Iran. *Genet Test* **2008**, *12*, 549-556, doi:10.1089/gte.2008.0018.
7. Saha, D.; Chowdhury, P.K.; Panja, A.; Pal, D.; Nayek, K.; Chakraborty, G.; Sharma, P.; Das, R.; Basu, S.; Chatterjee, R.; et al. Effect of deletions in the alpha-globin gene on the phenotype severity of beta-thalassemia. *Hemoglobin* **2022**, *46*, 118-123, doi:10.1080/03630269.2022.2088381.
8. Winichagoon, P.; Fucharoen, S.; Chen, P.; Wasi, P. Genetic factors affecting clinical severity in beta-thalassemia syndromes. *J Pediatr Hematol Oncol* **2000**, *22*, 573-580, doi:10.1097/00043426-200011000-00026.
9. Ho, P.J.; Hall, G.W.; Luo, L.Y.; Weatherall, D.J.; Thein, S.L. Beta-thalassaemia intermedia: is it possible consistently to predict phenotype from genotype? *Br J Haematol* **1998**, *100*, 70-78, doi:10.1046/j.1365-2141.1998.00519.x.
10. Perera, S.; Allen, A.; Silva, I.; Hapugoda, M.; Wickramarathne, M.N.; Wijesiriwardena, I.; Allen, S.; Rees, D.; Efremov, D.G.; Fisher, C.A.; et al. Genotype-phenotype association analysis identifies the role of alpha globin genes in modulating disease severity of beta thalassaemia intermedia in Sri Lanka. *Sci Rep* **2019**, *9*, 10116, doi:10.1038/s41598-019-46674-y.
11. Sripichai, O.; Munkongdee, T.; Kumkhaek, C.; Svasti, S.; Winichagoon, P.; Fucharoen, S. Coinheritance of the different copy numbers of alpha-globin gene modifies severity of beta-thalassemia/Hb E disease. *Ann Hematol* **2008**, *87*, 375-379, doi:10.1007/s00277-007-0407-2.
